# Supplementary material for: Tensile strain and altered synovial tissue metabolism in human knee osteoarthritis
Source: PubMed Central journal article supplement (PMC9576717; doi:10.1038/s41598-022-22459-8), 2022-10-17
Supplement: 41598_2022_22459_MOESM6_ESM.pdf [file 41598_2022_22459_MOESM6_ESM.pdf]

## Supplementary Material

**Supplementary Table 1**

**Linear mixed effects regression model estimates for 3-NT immunofluorescence between tensile strain conditions**

|                                                                               | $\beta$ coefficient | Standard Error | 95% CI               |
|-------------------------------------------------------------------------------|---------------------|----------------|----------------------|
| <b>Model 1: %3-NT+ cells</b>                                                  |                     |                |                      |
| Tensile strain:                                                               |                     |                |                      |
| Control                                                                       | Reference           | Reference      | Reference            |
| Low frequency                                                                 | 0.41                | 7.63           | -14.55 to 15.37      |
| High frequency                                                                | <b>16.83</b>        | <b>7.63</b>    | <b>1.87 to 31.79</b> |
| <b>Model 2: %3-NT+ macrophages</b>                                            |                     |                |                      |
| Tensile strain:                                                               |                     |                |                      |
| Control                                                                       | Reference           | Reference      | Reference            |
| Low frequency                                                                 | -5.90               | 7.85           | -21.29 to 9.49       |
| High frequency                                                                | 1.86                | 7.85           | -13.52 to 17.25      |
| <b>Model 3: %3NT+ cells with strain x Total lining macrophage interaction</b> |                     |                |                      |
| Tensile strain:                                                               |                     |                |                      |
| Control                                                                       | Reference           | Reference      | Reference            |
| Low frequency                                                                 | -0.45               | 10.35          | -20.74 to 19.84      |
| High frequency                                                                | <b>26.29</b>        | <b>10.00</b>   | <b>6.68 to 45.89</b> |
| Total Lining Macrophages                                                      | 0.27                | 0.36           | -0.44 to 0.98        |
| <b>Tensile Strain x Total Lining Macrophages</b>                              |                     |                |                      |
| Control x Total lining macrophages                                            | Reference           | Reference      | Reference            |
| Low frequency x Total lining macrophages                                      | 0.14                | 0.56           | -0.95 to 1.23        |
| High frequency x Total lining macrophages                                     | -0.81               | 0.53           | -1.86 to 0.23        |

Bolded value indicates significance at the 5% level

Random intercepts specified by individual

Independent covariance structure
